# Supplementary material
Source: PubMed Central journal article supplement (PMC3615419)

S1

A

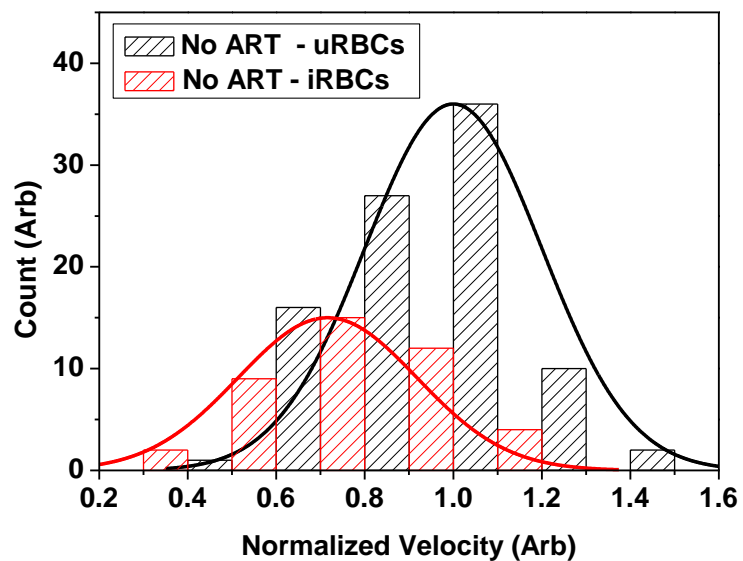

B

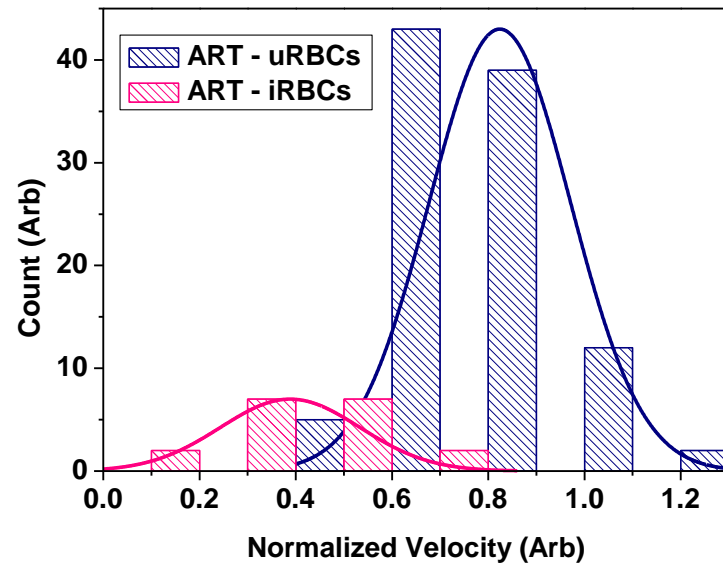

C

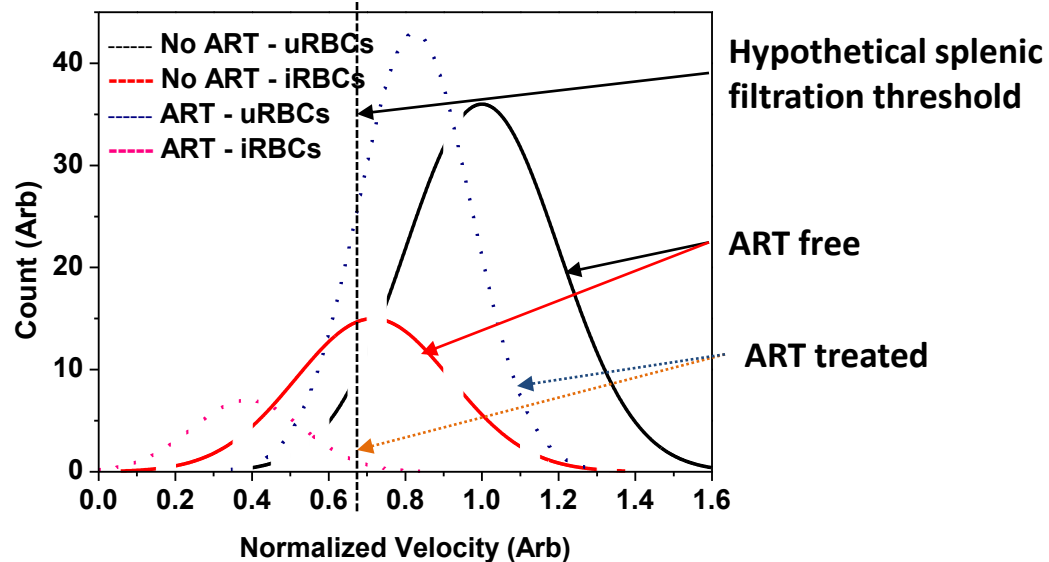

Supplement: NIHMS438511-supplement-ESI_Figure_S1.pdf [file NIHMS438511-supplement-ESI_Figure_S1.pdf]

S2

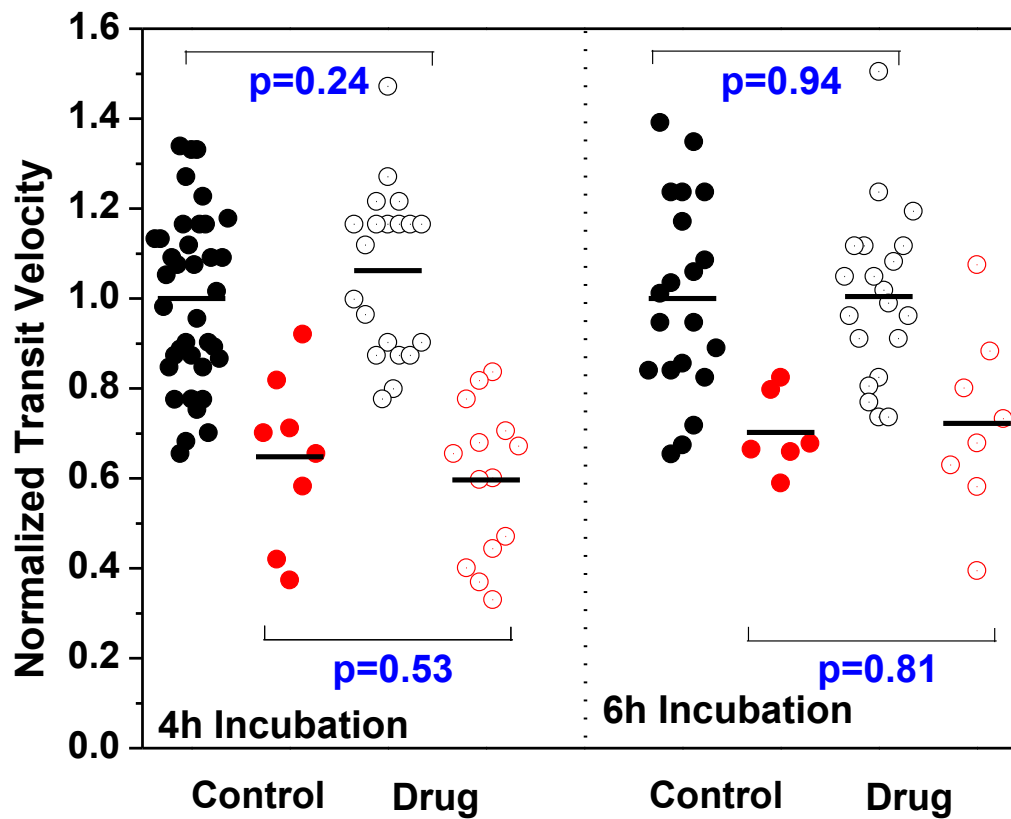

Supplement: NIHMS438511-supplement-ESI_Figure_S2.pdf [file NIHMS438511-supplement-ESI_Figure_S2.pdf]

# S3

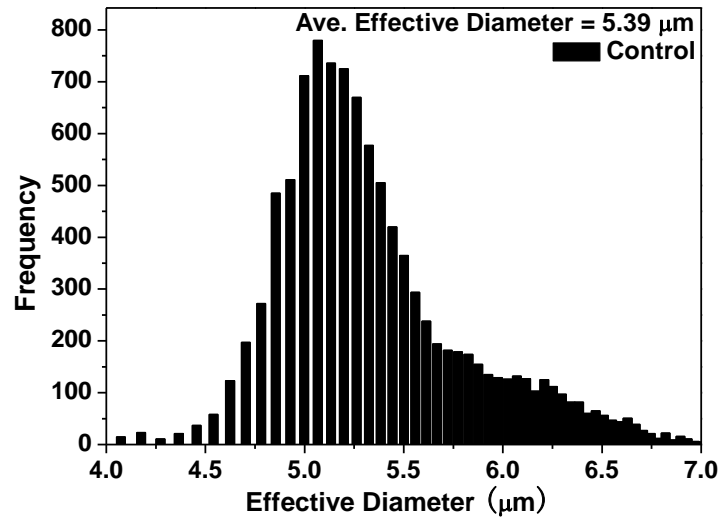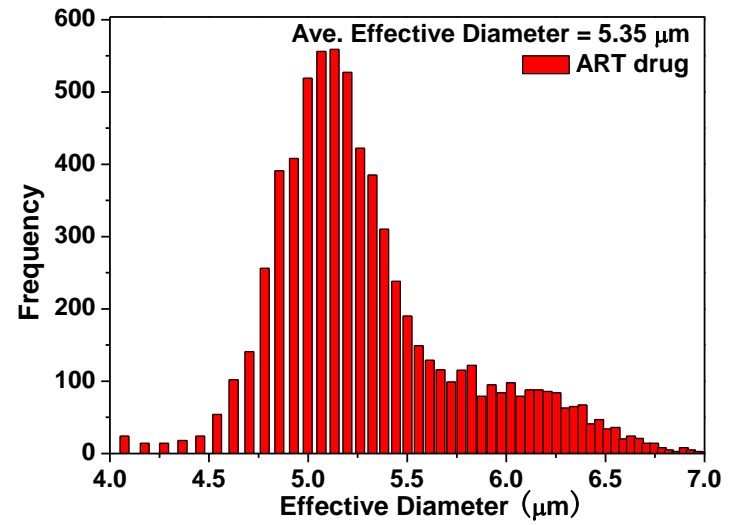

Supplement: NIHMS438511-supplement-ESI_Figure_S3.pdf [file NIHMS438511-supplement-ESI_Figure_S3.pdf]
